# Supplementary material for: A photofunctional bottom-up bis(dipyrrinato)zinc(II) complex nanosheet
Source: PubMed Central journal article supplement (PMC4396372; doi:10.1038/ncomms7713), 2015-04-02
Supplement: ncomms7713-s1.pdf [file ncomms7713-s1.pdf]

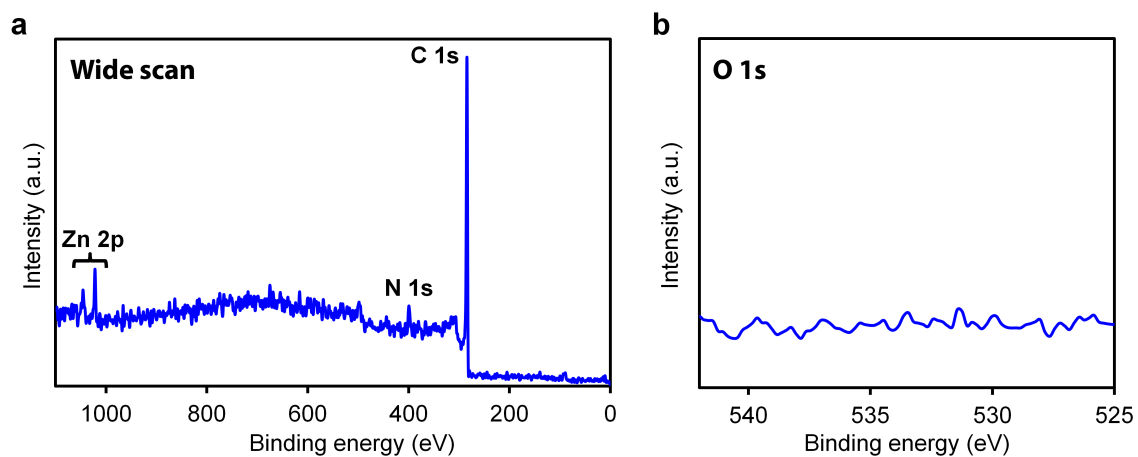

**Supplementary Figure 1 | XPS of multi-layer N1 on HOPG.** (a) Wide-scan. (b) Narrow-scan focusing on the O 1s region. The sample was subjected to argon sputtering to remove the outermost layer contaminated by oxygen and/or water. The vertical axis is not corrected using the ionization cross-section.

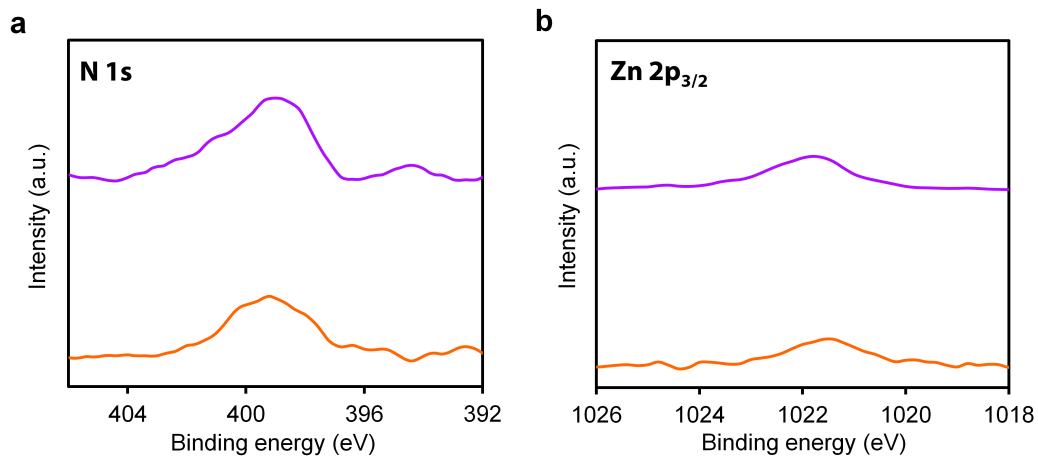

**Supplementary Figure 2 | XPS of the products of the one-phase reactions.** (a) Narrow-scan focusing on the N 1s region. (b) Focusing on the Zn 2p<sub>3/2</sub> region. Orange solid line: synthesized at room temperature in dichloromethane (Fig. 2f), purple solid line: 105°C in *N,N*-dimethylformamide (Fig. 2g). The sample was immobilized on a piece of conductive adhesive carbon tape. The intensity is proportional to the element abundance: The original signal is standardized using the photoionization cross-section of each element. N : Zn = 5.4 : 1 (84.4 : 15.6) for room temperature in dichloromethane and 5.8 : 1 (85.3 : 14.7) for 105°C in *N,N*-dimethylformamide.

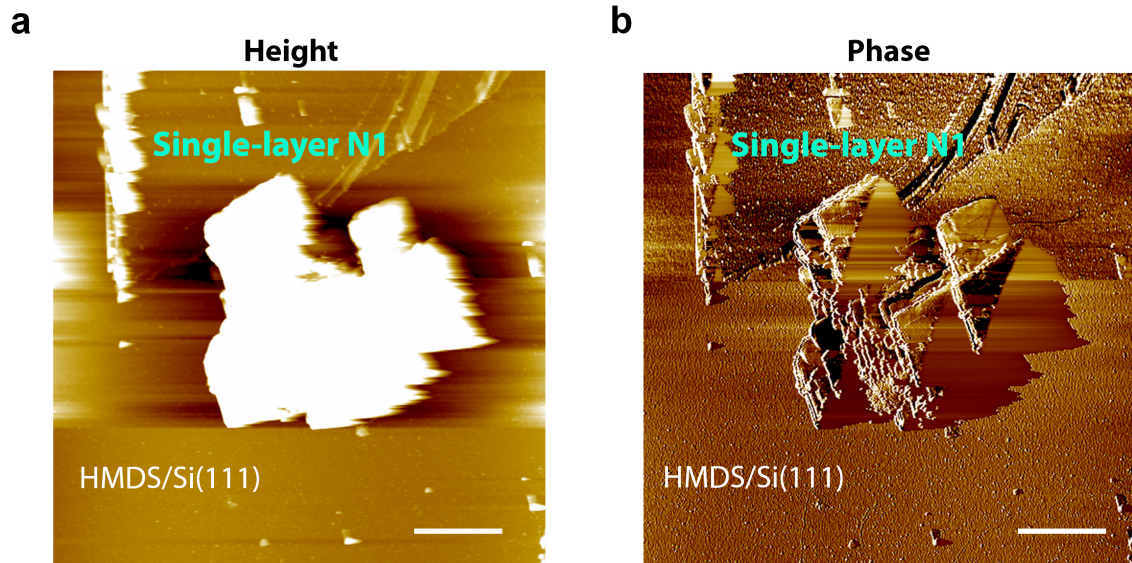

**Supplementary Figure 3 | AFM images of N1 on HMDS/Si(111) scratched by an AFM tip at a force of  $1.2 \times 10^4$  nN. (a) Height image. (b) Phase image. This scratch ended in the destruction of both N1 and HMDS/Si(111) surface. Scale bar, 1  $\mu\text{m}$ .**

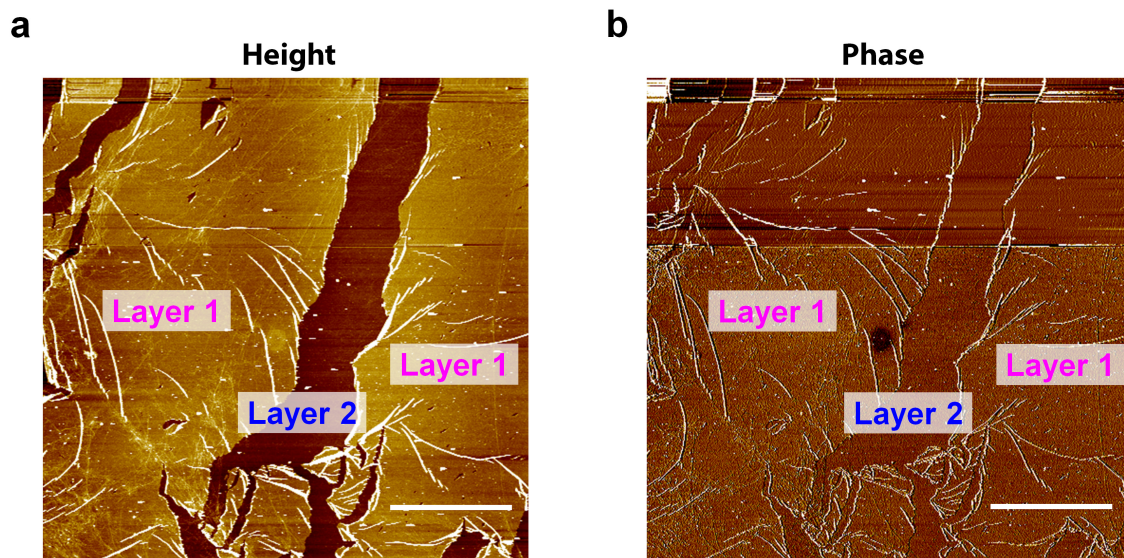

**Supplementary Figure 4 | AFM image of few-layer N1 with large domain sizes on HMDS/Si(111).** (a) Height image. (b) Phase image. In the height image, at least two-layers can be recognized (Layers 1 and 2). Because the phase image is flat, both layers are assignable to **N1**, covering the entire surface in the scanned region. Scale bar, 5  $\mu\text{m}$ .



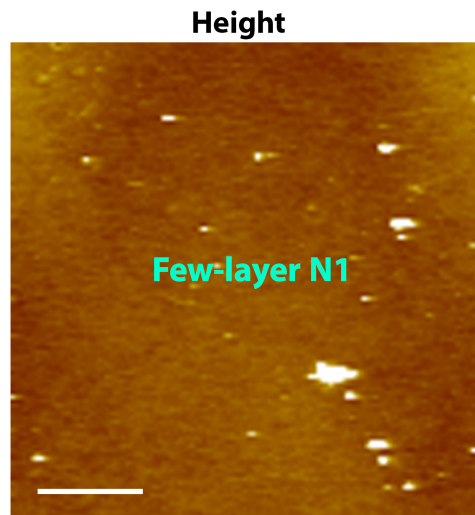

**Supplementary Figure 5 | AFM height image of few-layer N1 on HMDS/Si(111) after thermal annealing at 120°C for 3 days.** The entire surface of HMDS/Si(111) is covered with N1. The wrinkles observed in Supplementary Fig. S4 are removed. Scale bar, 1 μm.

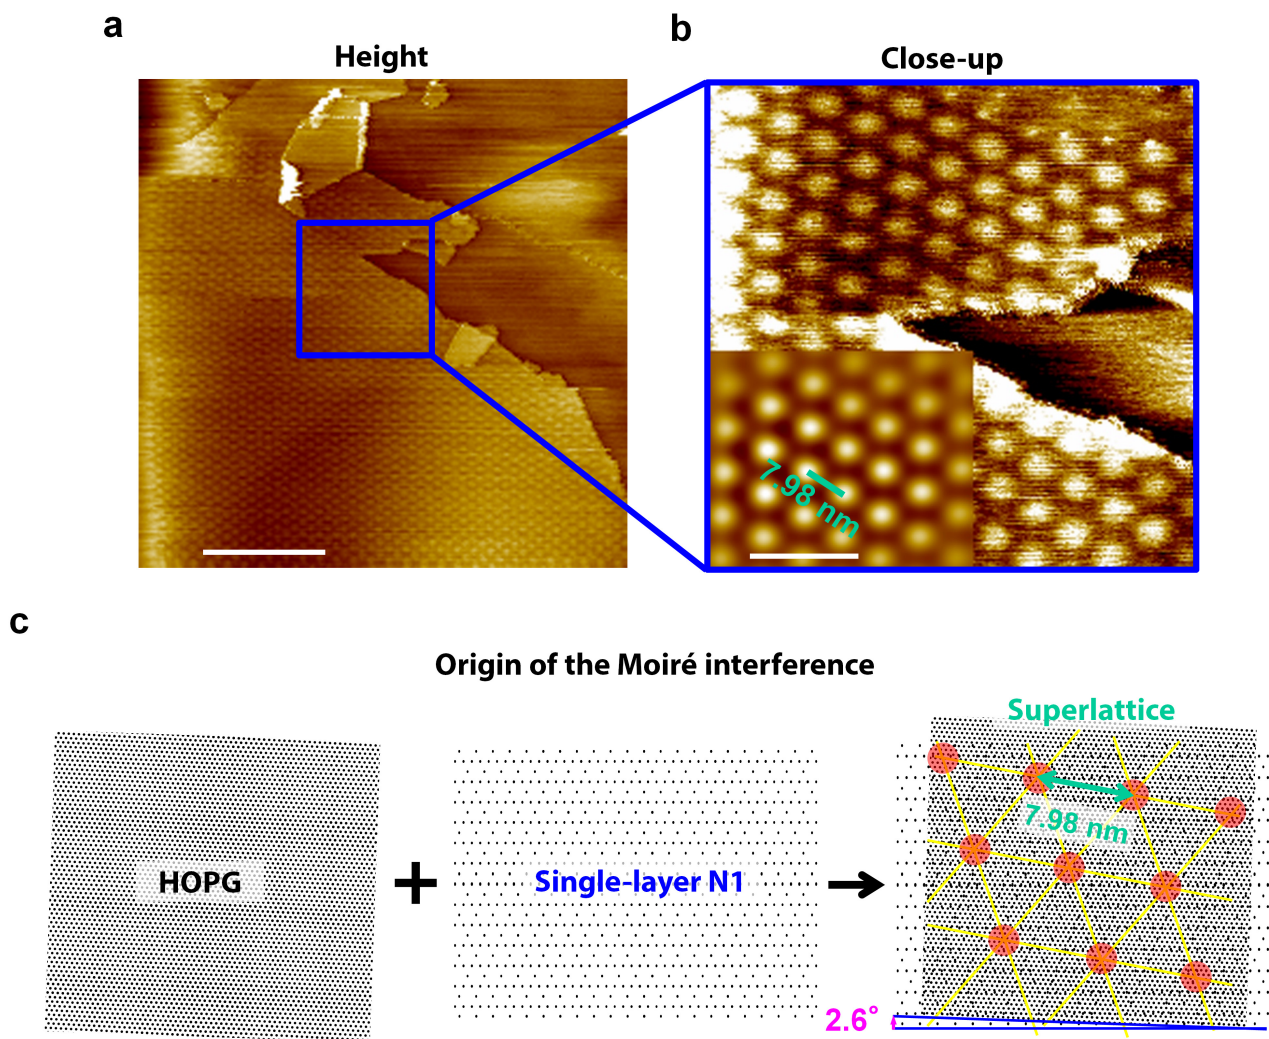

**Supplementary Figure 6 | STM image of single-layer N1 on HOPG.** (a) Height image exhibiting a hexagonal pattern. Scale bar, 100 nm. (b) Close-up of the height image. The bottom left corner shows a fast Fourier transform (FFT)-filtered image. Scale bar, 20 nm. The periodicity of the pattern is 7.98 nm, which is too large to assign as the direct structure of single-layer N1 (3.58 nm, Supplementary Fig. 8). Therefore, the observed hexagonal pattern is derived from moiré interference between two hexagonal lattices, HOPG (0.246 nm) and single-layer N1. (c) Schematic illustration of the overlap between single-layer N1 and the HOPG lattice that produces the observed moiré superlattice. The rotation angle is 2.6°. Details of the analysis are provided in previous literature references.<sup>1,2</sup>

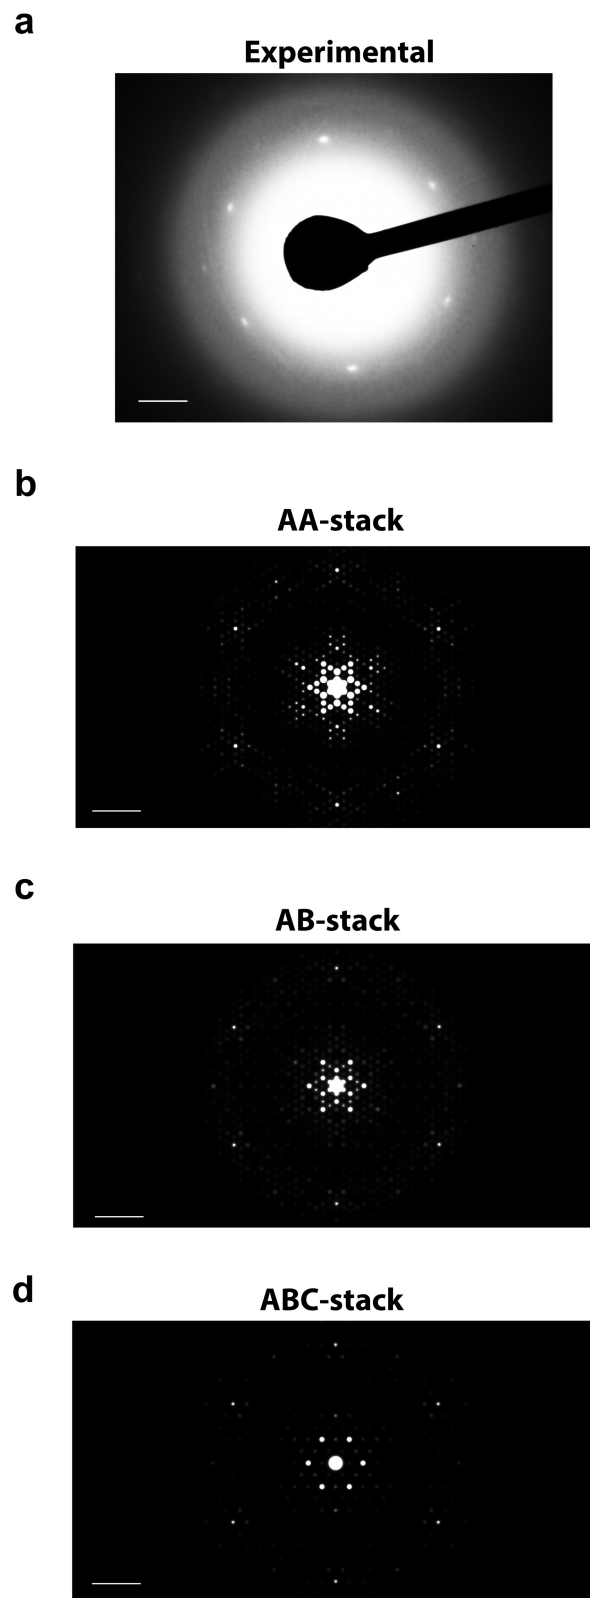

**Supplementary Figure 7 | TEM/SAED pattern of multi-layer N1 at room temperature.** (a) Recorded with a nominal camera length of 20 cm. Lower-index diffractions are disturbed by a direct electron beam. Scale bar,  $2 \text{ nm}^{-1}$ . (b-d) Simulated from the crystal lattices shown in Supplementary Fig. 8. Viewed along the  $[001]$  axis. Scale bar,  $2 \text{ nm}^{-1}$ .

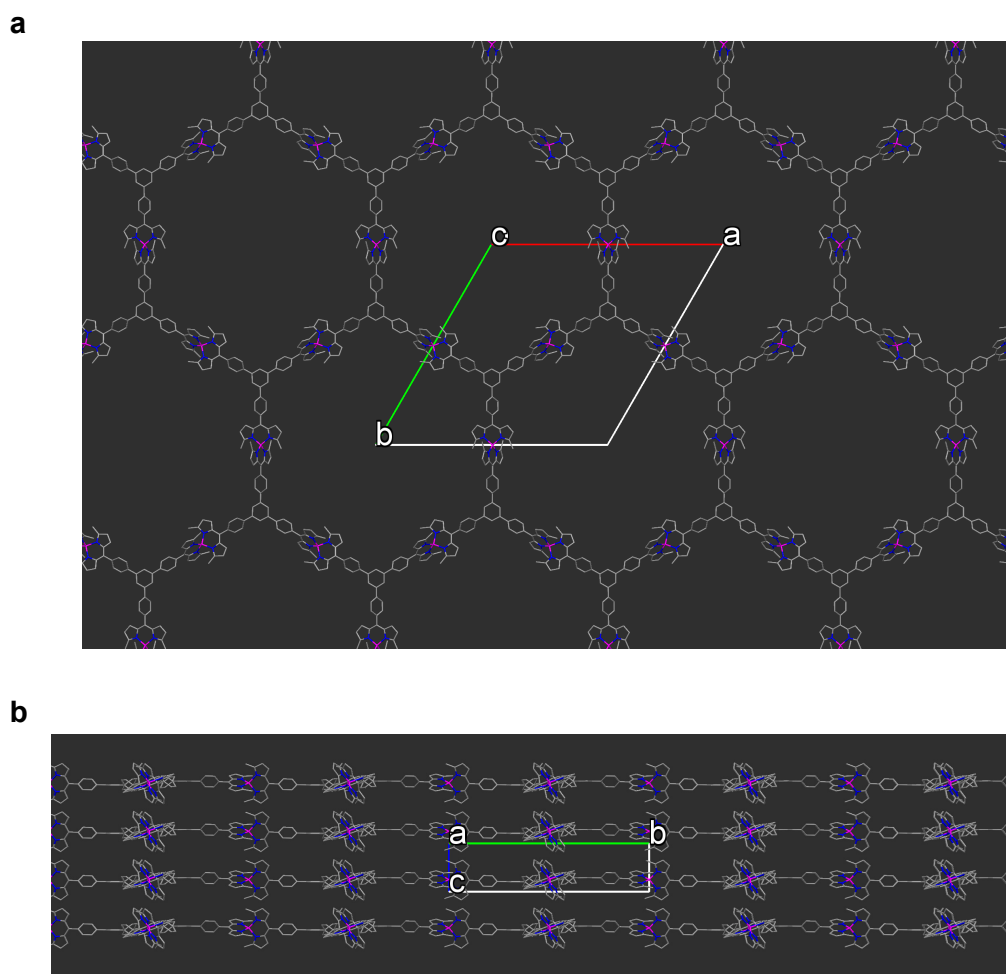

**Supplementary Figure 8 | Three-dimensional lattices of N1 optimized using molecular mechanics (UFF VALBOND 1.1). (a,b)** AA-stack structure viewed along the  $c$  and  $a$  axes, respectively. The unit cell takes a pseudo-trigonal symmetry:  $a = 35.9 \text{ \AA}$ ,  $b = 35.8 \text{ \AA}$ ,  $c = 7.46 \text{ \AA}$ ,  $\alpha = \beta = 90^\circ$ ,  $\gamma = 120^\circ$ . Single-layer **N1** is stacked in the eclipsed fashion. Gray, blue, and magenta correspond to carbon, nitrogen, and zinc, respectively.

**c**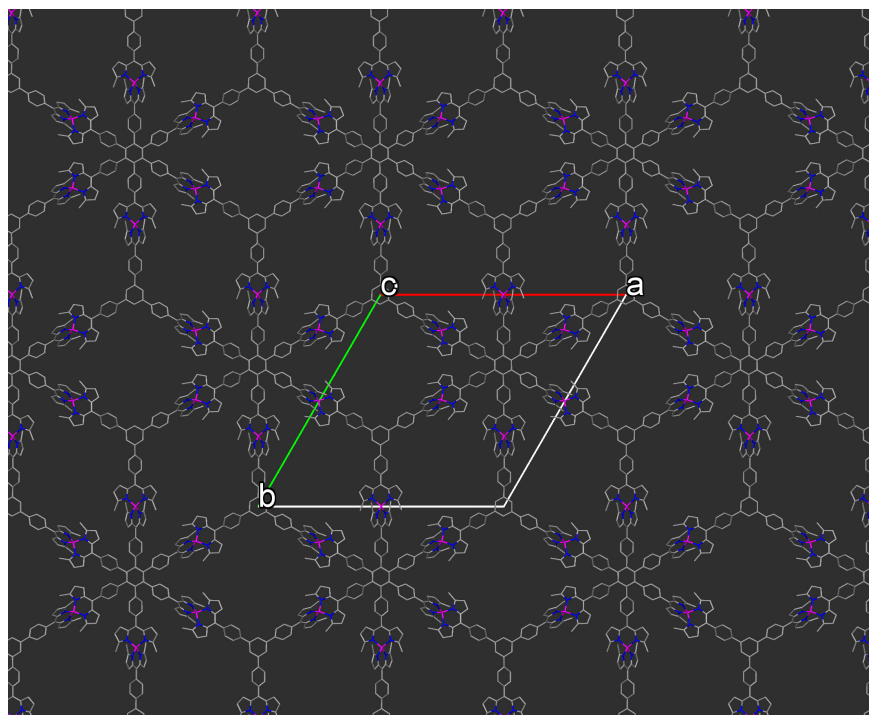**d**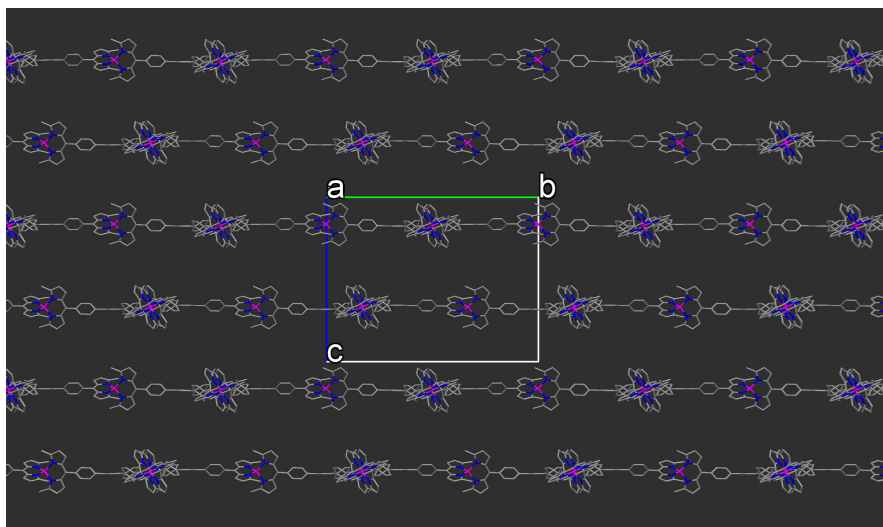

**Supplementary Figure 8 | Three-dimensional lattices of N1 optimized using molecular mechanics (UFF VALBOND 1.1) (continued).** (c,d) AB-stack structure viewed along the  $c$  and  $a$  axes, respectively. The unit cell takes a pseudo-trigonal symmetry:  $a = 36.0 \text{ \AA}$ ,  $b = 35.8 \text{ \AA}$ ,  $c = 24.0 \text{ \AA}$ ,  $\alpha = \beta = 90^\circ$ ,  $\gamma = 120^\circ$ . Single-layer **N1** is stacked in a staggered fashion with a translation vector of  $1/2(\mathbf{a} + \mathbf{b} + \mathbf{c})$ . Gray, blue, and magenta correspond to carbon, nitrogen, and zinc, respectively.

**e**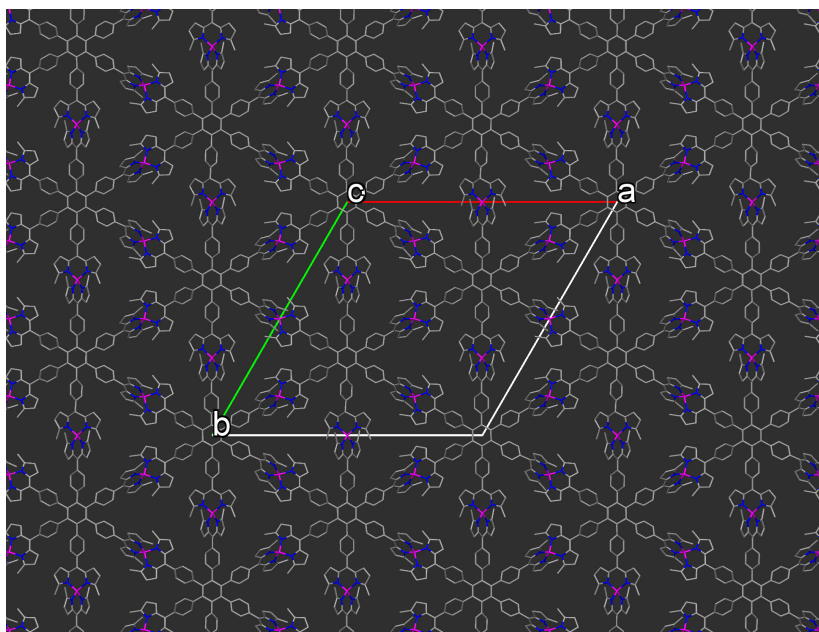**f**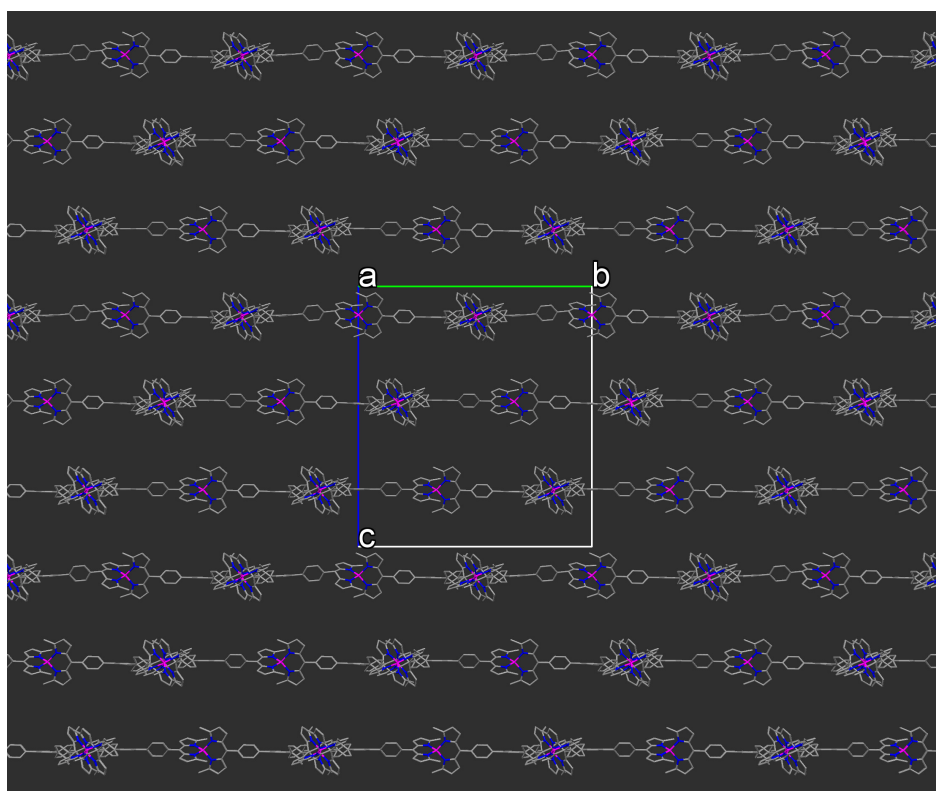

**Supplementary Figure 8 | Three-dimensional lattices of N1 optimized using molecular mechanics (UFF VALBOND 1.1) (continued).** (e,f) ABC-stack structure viewed along the  $c$  and  $a$  axes, respectively. The unit cell takes a pseudo-trigonal symmetry:  $a = 35.8 \text{ \AA}$ ,  $b = 35.8 \text{ \AA}$ ,  $c = 34.5 \text{ \AA}$ ,  $\alpha = \beta = 90^\circ$ ,  $\gamma = 120^\circ$ . Single-layer N1 is stacked in a staggered fashion with a translation vector of  $1/3(\mathbf{a} + \mathbf{b} + \mathbf{c})$ . Gray, blue, and magenta correspond to carbon, nitrogen, and zinc, respectively.



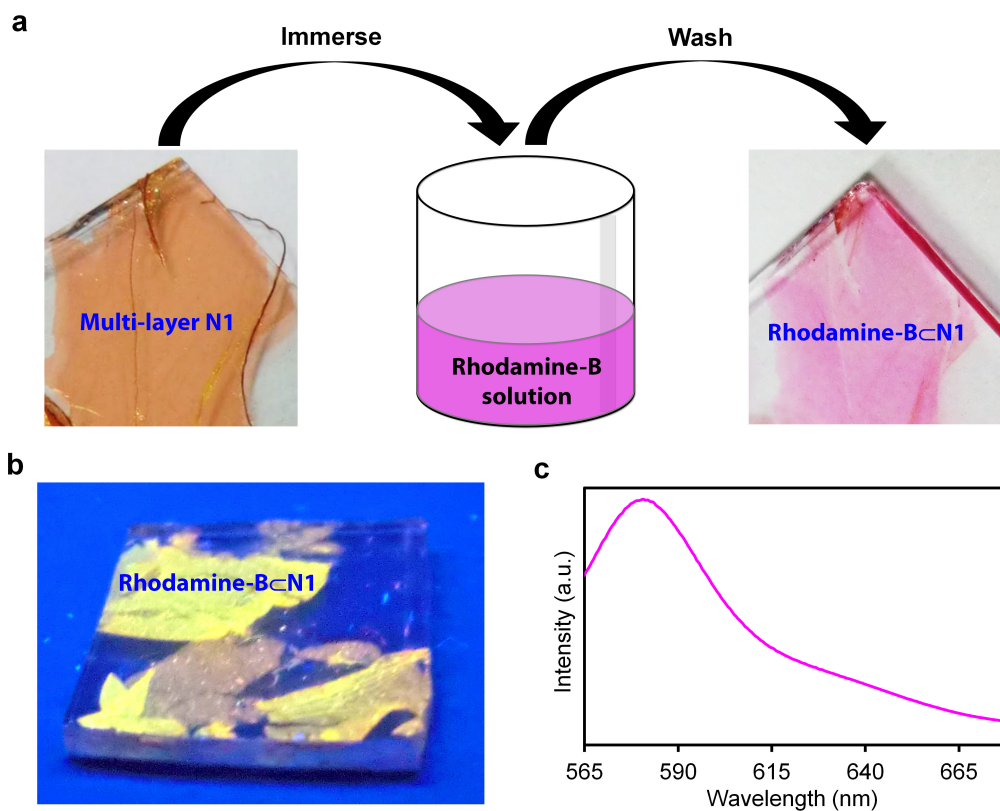

**Supplementary Figure 9 | Inclusion of fluorescent guest molecules in multi-layer N1.** (a) Schematic illustration of the uptake process of Rhodamine B in multi-layer **N1** (**Rhodamine-B@N1**) on transparent substrates. (b) Photographs of **Rhodamine-B@N1** on a quartz substrate under black light with a wavelength of 365 nm. The yellow fluorescence derived from Rhodamine B is conspicuous. (c) Fluorescence spectrum of **Rhodamine-B@N1** on a quartz substrate upon excitation with 543-nm light.



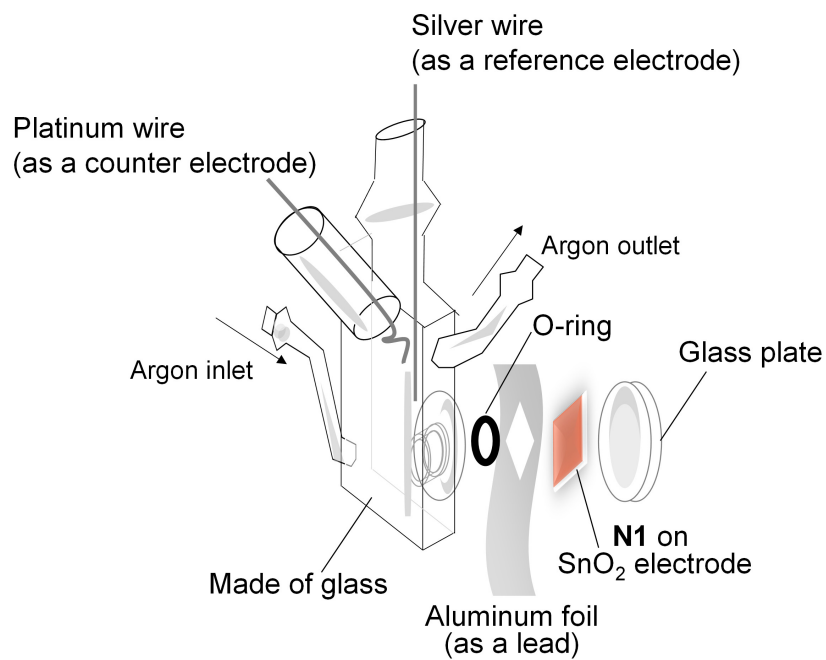

**Supplementary Figure 10 | Three-electrode electrochemical cell used for the photocurrent generation.** The components are clipped to ensure sealability. The cell is filled with an electrolyte solution during the measurement. The incident light is illuminated in the direction vertical to the SnO<sub>2</sub> electrode.

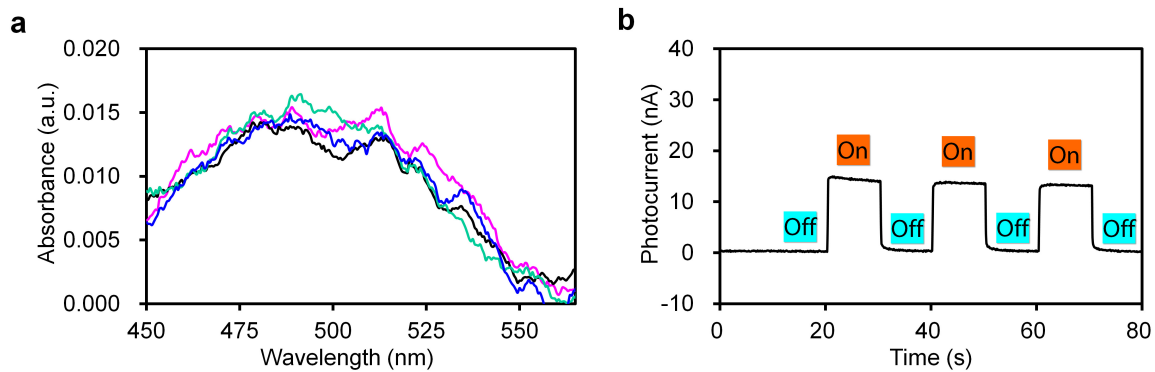

**Supplementary Figure 11 | Determination of the quantum yield for the photoelectric conversion of N1.** (a) Typical absorption spectra of **N1** on a SnO<sub>2</sub> electrode. The data were acquired from four different points. (b) Typical anodic current response upon irradiation of the **N1**-physisorbed SnO<sub>2</sub> electrode with intermittent 500-nm light. Light intensity, 0.18 mW. This measurement produced a quantum efficiency of 0.65%.

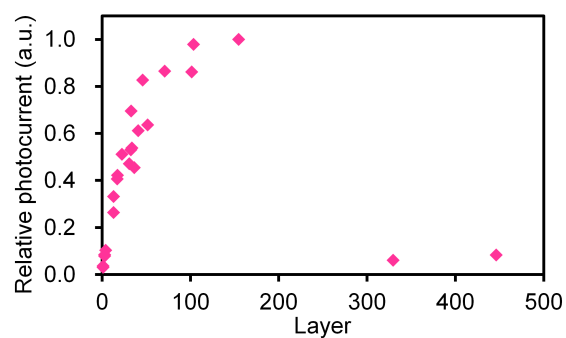

**Supplementary Figure 12 | Relationship between the relative photocurrent and thickness of N1 upon irradiation with 500-nm light.** The photocurrent was corrected by the intensity of incident light. The highest photocurrent (39 nA with an incident light intensity of 0.16 mW by 154-layer **N1**) is taken as the standard.

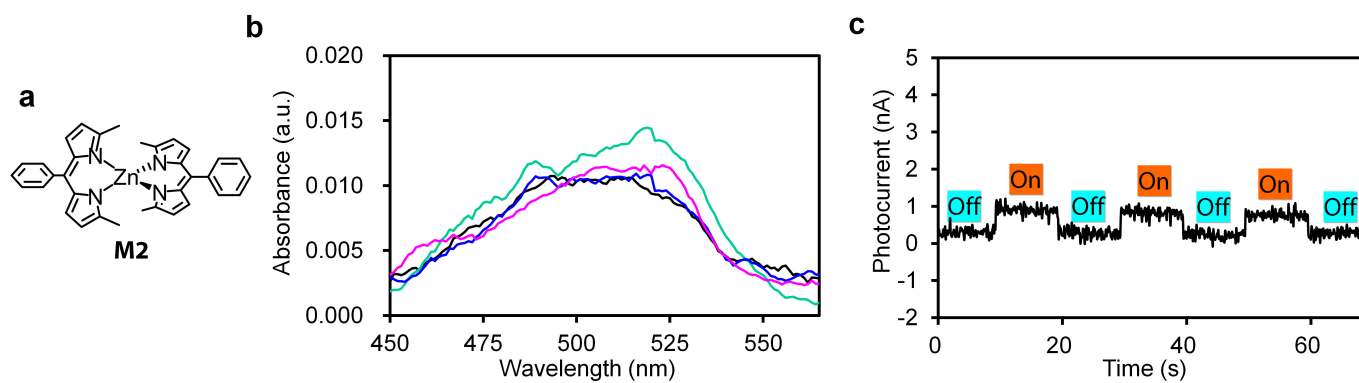

**Supplementary Figure 13 | Determination of the quantum yield for the photoelectric conversion of a referential bis(dipyrinato)zinc(II) complex dye.** (a) Chemical structure of mononuclear complex **M2**. (b) Absorption spectra of **M2** deposited on a SnO<sub>2</sub> electrode. The data were acquired from four different points. (c) Anodic current response upon irradiation of the **M2**-physisorbed SnO<sub>2</sub> electrode with intermittent 500-nm light. Light intensity, 0.19 mW. This measurement produced a quantum efficiency of 0.030%.

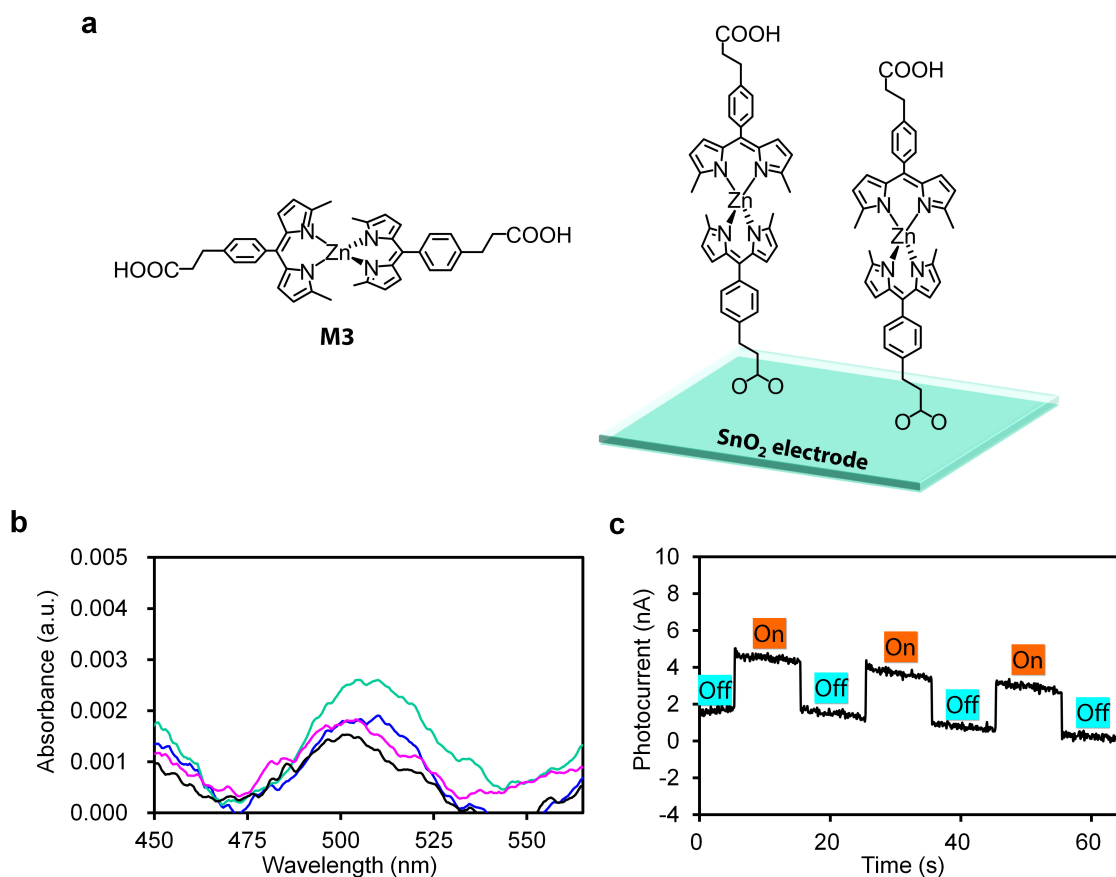

**Supplementary Figure 14 | Determination of the quantum yield for the photoelectric conversion of a referential bis(dipyrinato)zinc(II) complex dye. (a)** Chemical structure of mononuclear complex **M3** and a schematic illustration on its self-assembled monolayer (SAM) on a SnO<sub>2</sub> electrode. **(b)** Absorption spectra of **M3** immobilized as a SAM on a SnO<sub>2</sub> electrode. The data were acquired from four different points. **(c)** Anodic current response upon irradiation of the **M3**-chemisorbed SnO<sub>2</sub> electrode with intermittent 500-nm light. Light intensity, 1.8 mW. This measurement produced a quantum efficiency of 0.069%.

### Supplementary References

1. Tkatchenko, A. Commensurate monolayers on surfaces: Geometry and ground states. *Phys. Rev. B* **75**, 235411 (2007).
2. Kambe, T. *et al.*  $\pi$ -Conjugated nickel bisdithiolene complex nanosheet. *J. Am. Chem. Soc.* **135**, 2462–2465 (2013).
